# Supplementary material for: Roles of Cytokines in the Temporal Changes of Microglial Membrane Currents and Neuronal Excitability and Synaptic Efficacy in ATP-Induced Cortical Injury Model
Source: MDPI journal article supplement (doi:10.3390/ijms22136853), 2021-06-25
Supplement: s1 [file s1]

**Table S1. Summary of statistics for Figures 1, 3, 4, 5, 6, and 7.**

| Figures         |          | Variable                      | statistics        | N                                                                         | F value                                                                                         | P value                                                              | Post hoc test               |
|-----------------|----------|-------------------------------|-------------------|---------------------------------------------------------------------------|-------------------------------------------------------------------------------------------------|----------------------------------------------------------------------|-----------------------------|
| <b>Figure 1</b> | <b>C</b> | Core + Penumbra area of 3 dpi | Two-tailed t-test | 7 dpi: 8<br>28 dpi: 4<br>Nd 3: 7<br>Nd 7: 4<br>Nd 28: 5                   | F=0.15<br>F=0.47<br>F=0.63<br>F=0.12<br>F=0.48                                                  | P < 0.001<br>P < 0.001<br>P < 0.001<br>P < 0.001<br>P < 0.001        | -                           |
|                 | <b>D</b> | Soma size of con              | Two-tailed t-test | 3 dpi: 38<br>7 dpi: 38<br>28 dpi: 38<br>Nd 3: 31<br>Nd 7: 29<br>Nd 28: 24 | F < 0.05<br>F < 0.05<br>F=0.62<br>F < 0.05<br>F < 0.05<br>F=0.1                                 | P < 0.001<br>P < 0.001<br>P=0.69<br>P < 0.001<br>P < 0.001<br>P=0.99 | -                           |
|                 | <b>E</b> | GFP F. I. of con              | Two-tailed t-test | 3 dpi: 13<br>7 dpi: 13<br>28 dpi: 4<br>Nd 3: 7<br>Nd 7: 4<br>Nd 28: 4     | F < 0.05<br>F=0.09<br>F=0.2<br>F=0.21<br>F < 0.05<br>F=0.67                                     | P < 0.001<br>P < 0.001<br>P < 0.001<br>P=0.001<br>P=0.17<br>P=0.28   | -                           |
|                 | <b>F</b> | DAPI num. of con              | Two-tailed t-test | 3 dpi: 13<br>7 dpi: 13<br>28 dpi: 4<br>Nd 3: 7<br>Nd 7: 4<br>Nd 28: 4     | F=0.05<br>F=0.63<br>F=0.92<br>F=0.89<br>F=0.49<br>F=0.5                                         | P=0.75<br>P < 0.001<br>P < 0.001<br>P=0.84<br>P=0.26<br>P=0.45       | -                           |
|                 |          |                               |                   |                                                                           |                                                                                                 |                                                                      |                             |
| <b>Figure 3</b> | <b>A</b> | Num. of spikes                | Two-way ANOVA     | 3 dpi: 17<br>7 dpi: 13<br>28 dpi: 11                                      | 65.83                                                                                           | P < 0.001                                                            | Tukey's multiple comparison |
|                 | <b>B</b> | Vm                            | Two-tailed t-test | Nd 3: 16<br>Nd 7: 9<br>Nd 28: 14                                          | F=0.2<br>F=0.68<br>F=0.3<br>F=0.34<br>F=0.72<br>F=0.18                                          | P=0.71<br>P=0.56<br>P=0.89<br>P=0.78<br>P=0.51<br>P=0.64             | -                           |
|                 | <b>C</b> | I/V                           | Two-way ANOVA     |                                                                           | 11.98                                                                                           | P < 0.001                                                            | Tukey's multiple comparison |
|                 | <b>D</b> | Rheobase of con               | Two-tailed t-test |                                                                           | 3 dpi: 0.18<br>7 dpi: 0.41<br>28 dpi: F < 0.05<br>Nd 3: F < 0.05<br>Nd 7: 0.34<br>Nd 28: 0.43   | P=0.001<br>P=0.19<br>P=0.06<br>P=0.41<br>P=0.17<br>P=0.003           | -                           |
|                 | <b>E</b> | Rm of con                     | Two-tailed t-test |                                                                           | 3 dpi: F < 0.05<br>7 dpi: 0.19<br>28 dpi: F < 0.05<br>Nd 3: 0.2<br>Nd 7: F < 0.05<br>Nd 28: 0.4 | P=0.07<br>P=0.67<br>P=0.99<br>P=0.74<br>P=0.03<br>P=0.03             | -                           |
|                 | <b>F</b> | Cm                            | Two-tailed t-test |                                                                           | 3 dpi: 0.59<br>7 dpi: 0.98<br>28 dpi: F < 0.05<br>Nd 3: 0.61<br>Nd 7: F < 0.05<br>Nd 28: 0.33   | P=0.002<br>P=0.02<br>P=0.33<br>P=0.02<br>P < 0.001<br>P=0.006        | -                           |
|                 | <b>G</b> | Peak amp. 30                  | Two-tailed t-test |                                                                           | 3 dpi: F < 0.05<br>7 dpi: 0.06                                                                  | P=0.22<br>P=0.38                                                     | -                           |

|          |   |                        |                                                        |                                                                         |                                                                                |                                                       |                             |
|----------|---|------------------------|--------------------------------------------------------|-------------------------------------------------------------------------|--------------------------------------------------------------------------------|-------------------------------------------------------|-----------------------------|
| Figure 4 | H | pA                     | test                                                   |                                                                         | 28 dpi: F < 0.05                                                               | P=0.25                                                | -                           |
|          |   | 90 pA                  |                                                        |                                                                         | 3 dpi: 0.1<br>7 dpi: F < 0.05<br>28 dpi: 0.4                                   | P=0.17<br>P=0.02<br>P=0.06                            |                             |
|          |   | 150 pA                 |                                                        |                                                                         | 3 dpi: 0.16<br>7 dpi: 0.06<br>28 dpi: 0.43                                     | P=0.17<br>P=0.03<br>P=0.09                            |                             |
|          |   | Half-width 30 pA       | 3 dpi: F < 0.05<br>7 dpi: F < 0.05<br>28 dpi: 0.41     |                                                                         | P=0.26<br>P=0.15<br>P=0.39                                                     |                                                       |                             |
|          |   | 90 pA                  | 3 dpi: 0.23<br>7 dpi: 0.99<br>28 dpi: 0.52             |                                                                         | P=0.78<br>P=0.53<br>P=0.85                                                     |                                                       |                             |
|          |   | 150 pA                 | 3 dpi: F < 0.05<br>7 dpi: F < 0.05<br>28 dpi: F < 0.05 |                                                                         | P=0.71<br>P=0.06<br>P=0.49                                                     |                                                       |                             |
|          | J | Freq. of sIPSC Con     | Two-tailed t-test                                      | Con: 14<br>3 dpi: 16<br>7 dpi: 16<br>28 dpi: 14                         | 3 dpi: F < 0.05<br>7 dpi: 0.86<br>28 dpi: 0.45                                 | P=0.04<br>P=0.45<br>P=0.28                            | -                           |
|          |   | 3 dpi                  |                                                        |                                                                         | 7 dpi: F < 0.05<br>28 dpi: 0.06                                                | P=0.003<br>P=0.34                                     |                             |
|          | K | Peak amp. of sIPSC Con | Two-tailed t-test                                      |                                                                         | 3 dpi: 0.21<br>7 dpi: 0.51<br>28 dpi: 0.81                                     | P=0.02<br>P=0.195<br>P=0.89                           | -                           |
|          |   | 3 dpi                  |                                                        |                                                                         | 7 dpi: 0.54<br>28 dpi: 0.32                                                    | P=0.24<br>P=0.02                                      |                             |
|          | L | Freq. of sEPSC Con     | Two-tailed t-test                                      |                                                                         | 3 dpi: 0.06<br>7 dpi: 0.57<br>28 dpi: 0.11                                     | P=0.01<br>P=0.3<br>P=0.93                             | -                           |
|          | M | Peak amp. of sEPSC     | Two-tailed t-test                                      |                                                                         | 3 dpi: F < 0.05<br>7 dpi: F < 0.05<br>28 dpi: 0.69                             | P=0.5<br>P=0.66<br>P=0.09                             | -                           |
|          | N | E/I amp. ratio         | Two-tailed t-test                                      |                                                                         | 3 dpi: F < 0.05<br>7 dpi: 0.84<br>28 dpi: F < 0.05                             | P=0.18<br>P=0.44<br>P=0.16                            | -                           |
|          | O | E/I freq. ratio Con    | Two-tailed t-test                                      |                                                                         | 3 dpi: F < 0.05<br>7 dpi: F < 0.05<br>28 dpi: 0.54                             | P < 0.001<br>P=0.47<br>P=0.14                         | -                           |
|          | A | Current density        | Two-way ANOVA                                          | Con: 28<br>3 dpi: 30<br>7 dpi: 15<br>28 dpi: 15<br>Nd 3: 11<br>Nd 7: 11 | 175.4                                                                          | P < 0.001                                             | Tukey's multiple comparison |
|          |   | -150 mV con            | Two-tailed t-test                                      |                                                                         | 3 dpi: F < 0.05<br>7 dpi: F < 0.05<br>28 dpi: 0.64<br>Nd 3: 0.24<br>Nd 7: 0.64 | P < 0.001<br>P < 0.001<br>P=0.001<br>P=0.78<br>P=0.08 | -                           |
|          |   | -50 mV con             |                                                        |                                                                         | 3 dpi: F < 0.05<br>7 dpi: 0.32<br>28 dpi: F < 0.05<br>Nd 3: 0.89<br>Nd 7: 0.21 | P < 0.001<br>P < 0.001<br>P=0.02<br>P=0.35<br>P=0.49  |                             |
|          |   | 50 mV con              |                                                        |                                                                         | 3 dpi: F < 0.05<br>7 dpi: 0.13<br>28 dpi: 0.17<br>Nd 3: F < 0.05<br>Nd 7: 0.06 | P < 0.001<br>P=0.02<br>P=0.25<br>P < 0.001<br>P=0.21  |                             |
|          | B | Vm                     | Two-                                                   |                                                                         | 3 dpi: 0.769                                                                   | P=0.09                                                | -                           |

|  |          |                  |                   |                                                                                         |                                                                                                                                           |                                                                                               |   |
|--|----------|------------------|-------------------|-----------------------------------------------------------------------------------------|-------------------------------------------------------------------------------------------------------------------------------------------|-----------------------------------------------------------------------------------------------|---|
|  |          | Con              | tailed t-test     |                                                                                         | 7 dpi: 0.2<br>28 dpi: 0.38<br>Nd 3: 0.49<br>Nd 7: 0.29                                                                                    | P=0.39<br>P=0.003<br>P=0.68<br>P=0.39                                                         |   |
|  | <b>C</b> | Vr<br>Con        | Two-tailed t-test |                                                                                         | 3 dpi: F < 0.05<br>7 dpi: F < 0.05<br>28 dpi: F < 0.05<br>Nd 3: 0.06<br>Nd 7: F < 0.05                                                    | P < 0.001<br>P < 0.001<br>P=0.001<br>P=0.61<br>P=0.21                                         |   |
|  | <b>D</b> | Cm<br>Con        | Two-tailed t-test |                                                                                         | 3 dpi: F < 0.05<br>7 dpi: 0.9<br>28 dpi: 0.56<br>Nd 3: 0.52<br>Nd 7: 0.41                                                                 | P=0.03<br>P=0.72<br>P=0.93<br>P=0.32<br>P=0.98                                                | - |
|  | <b>E</b> | Rm<br>Con        | Two-tailed t-test |                                                                                         | 3 dpi: F < 0.05<br>7 dpi: F < 0.05<br>28 dpi: 0.38<br>Nd 3: 0.49<br>Nd 7: F < 0.05                                                        | P < 0.001<br>P < 0.001<br>P < 0.001<br>P=0.48<br>P=0.49                                       | - |
|  | <b>N</b> | -150 mV<br>con   | Two-tailed t-test | Cs: 5<br>Ba: 10<br>4AP: 9<br>Qui.: 15<br>ML133: 16<br>Pax.: 10<br>A740.: 11<br>Sur.: 12 | Cs: 0.35<br>Ba: 0.05<br>4AP: 0.45<br>Qui.: 0.44<br>ML133: 0.1<br>Pax.: 0.14<br>A740.: 0.92<br>Sur.: 0.99                                  | P=0.55<br>P=0.55<br>P < 0.001<br>P=0.89<br>P=0.04<br>P=0.02<br>P=0.001<br>P < 0.001           | - |
|  |          | -150 mV<br>3 dpi |                   |                                                                                         | Cs: F < 0.05<br>Qui.: F < 0.05<br>4AP: F < 0.05<br>Ba: F < 0.05<br>ML133: F < 0.05<br>Pax.: F < 0.05<br>A740.: F < 0.05<br>Sur.: F < 0.05 | P < 0.001<br>P < 0.001<br>P=0.003<br>P < 0.001<br>P < 0.001<br>P=0.01<br>P < 0.001<br>P=0.003 |   |
|  |          | -50 mV<br>Con    |                   |                                                                                         | Cs: 0.91<br>Ba: F < 0.05<br>4AP: 0.09<br>Qui.: 0.99<br>ML133: 0.3<br>Pax.: 0.55<br>A740.: F < 0.05<br>Sur.: 0.69                          | P=0.17<br>P=0.02<br>P=0.005<br>P=0.25<br>P=0.09<br>P=0.63<br>P=0.78<br>P=0.02                 |   |
|  |          | -50 mV<br>3 dpi  |                   |                                                                                         | Cs: F < 0.05<br>Ba: 0.54<br>4AP: 0.15<br>Qui.: F < 0.05<br>ML133: F < 0.05<br>Pax.: F < 0.05<br>A740.: F < 0.05<br>Sur.: F < 0.05         | P < 0.001<br>P=0.67<br>P=0.07<br>P < 0.001<br>P < 0.001<br>P=0.001<br>P < 0.001<br>P=0.003    |   |
|  |          | 50 mV<br>Con     |                   |                                                                                         | Cs: 0.19<br>Ba: F < 0.05<br>4AP: F < 0.05<br>Qui.: F < 0.05<br>ML133: F < 0.05<br>Pax.: F < 0.05<br>A740.: F < 0.05<br>Sur.: F < 0.05     | P=0.11<br>P < 0.001<br>P=0.007<br>P=0.84<br>P < 0.001<br>P=0.01<br>P < 0.001<br>P < 0.001     |   |

|                 |          |                 |               |                                                                                                                                 |                                                                                                                                                          |                                                                                                      |                             |
|-----------------|----------|-----------------|---------------|---------------------------------------------------------------------------------------------------------------------------------|----------------------------------------------------------------------------------------------------------------------------------------------------------|------------------------------------------------------------------------------------------------------|-----------------------------|
|                 |          | 50 mV<br>3 dpi  |               |                                                                                                                                 | Cs: F < 0.05<br>Qui.: F < 0.05<br>4AP: F < 0.05<br>Ba: F < 0.05<br>ML133: F < 0.05<br>Pax.: 0.08<br>A740.: F < 0.05<br>Sur.: F < 0.05                    | P < 0.001<br>P < 0.001 |                             |
| <b>Figure 5</b> | <b>A</b> | Num. of spikes  | Two-way ANOVA | Con: 29<br>3 dpi: 16<br>TNF $\alpha$ : 11                                                                                       | 102.8                                                                                                                                                    | P < 0.001                                                                                            | Tukey's multiple comparison |
|                 | <b>B</b> | I/V             | Two-way ANOVA | IL1 $\beta$ : 11<br>IL10: 10<br>IL4: 16<br>ATP(1mM): 14<br>ATP $\gamma$ S (100 $\mu$ M): 6                                      | 47.63                                                                                                                                                    | P < 0.001                                                                                            | Tukey's multiple comparison |
|                 | <b>C</b> | Num. of spikes  | Two-way ANOVA | Con: 29<br>3 dpi: 16<br>3 dpi + IL10: 7                                                                                         | 122.1                                                                                                                                                    | P < 0.001                                                                                            | Tukey's multiple comparison |
|                 | <b>D</b> | I/V             | Two-way ANOVA | 3 dpi + IL4: 11                                                                                                                 | 66.09                                                                                                                                                    | P < 0.001                                                                                            | Tukey's multiple comparison |
| <b>Figure 6</b> | <b>A</b> | Current density | Two-way ANOVA | TNF $\alpha$ : 8<br>IL1 $\beta$ : 7<br>IL10: 7<br>IL4: 9<br>ATP $\gamma$ S (100 $\mu$ M): 7<br>ATP $\gamma$ S (300 $\mu$ M): 14 | 15.97                                                                                                                                                    | P < 0.001                                                                                            | Tukey's multiple comparison |
|                 |          | -150 mV         |               |                                                                                                                                 | TNF $\alpha$ : 0.57<br>IL1 $\beta$ : F < 0.05<br>IL10: 0.16<br>IL4: 0.81<br>ATP $\gamma$ S (100 $\mu$ M): F < 0.05<br>ATP $\gamma$ S (300 $\mu$ M): 0.13 | P=0.17<br>P=0.09<br>P=0.81<br>P=0.12<br>P=0.003<br>P=0.39                                            | -                           |
|                 |          | -50 mV          |               |                                                                                                                                 | TNF $\alpha$ : 0.34<br>IL1 $\beta$ : 0.64<br>IL10: F < 0.05<br>IL4: 0.4<br>ATP $\gamma$ S (100 $\mu$ M): F < 0.05<br>ATP $\gamma$ S (300 $\mu$ M): 0.34  | P=0.01<br>P=0.69<br>P=0.003<br>P=0.36<br>P=0.05<br>P=0.72                                            |                             |
|                 |          | 50 mV           |               |                                                                                                                                 | TNF $\alpha$ : 0.66<br>IL1 $\beta$ : 0.3<br>IL10: F < 0.05<br>IL4: 0.61<br>ATP $\gamma$ S (100 $\mu$ M): 0.97<br>ATP $\gamma$ S (300 $\mu$ M): F < 0.05  | P=0.78<br>P=0.24<br>P=0.003<br>P=0.31<br>P=0.91<br>P=0.14                                            |                             |
|                 |          |                 |               |                                                                                                                                 |                                                                                                                                                          |                                                                                                      |                             |
|                 |          |                 |               |                                                                                                                                 |                                                                                                                                                          |                                                                                                      |                             |
|                 | <b>B</b> | Current density | Two-way ANOVA | TNF $\alpha$ : 9<br>IL1 $\beta$ : 11<br>IL10: 8<br>IL4: 11<br>ATP: 14                                                           | 16.5                                                                                                                                                     | P < 0.001                                                                                            | Tukey's multiple comparison |
|                 |          | -150 mV         |               |                                                                                                                                 | TNF $\alpha$ : 0.51<br>IL1 $\beta$ : 0.96<br>IL10: F < 0.05<br>IL4: 0.56<br>ATP: F < 0.05                                                                | P=0.04<br>P=0.59<br>P=0.01<br>P=0.4<br>P=0.003                                                       | -                           |
|                 |          | -50 mV          |               |                                                                                                                                 | TNF $\alpha$ : 0.55<br>IL1 $\beta$ : 0.4                                                                                                                 | P=0.23<br>P=0.69                                                                                     |                             |

|                 |          |                  |                   |                                                                      |                                                                                                        |                                                |                             |
|-----------------|----------|------------------|-------------------|----------------------------------------------------------------------|--------------------------------------------------------------------------------------------------------|------------------------------------------------|-----------------------------|
|                 |          | 50 mV            |                   |                                                                      | IL10: 0.12<br>IL4: 0.11<br>ATP: 0.32                                                                   | P=0.88<br>P=0.11<br>P=0.69                     |                             |
|                 |          |                  |                   |                                                                      | TNF $\alpha$ : 0.79<br>IL1 $\beta$ : 0.08<br>IL10: F < 0.05<br>IL4: 1<br>ATP: 0.14                     | P=0.03<br>P=0.59<br>P=0.08<br>P=0.27<br>P=0.22 |                             |
|                 | <b>C</b> | Current density  | Two-way ANOVA     | IL1 $\beta$ +TNF $\alpha$ : 12<br>IL4+IL10: 12                       | 11.08                                                                                                  | P<0.001                                        | Tukey's multiple comparison |
|                 |          | -150 mV          |                   | IL1 $\beta$ +TNF $\alpha$ +IL4+IL10: 11                              | IL1 $\beta$ +TNF $\alpha$ : 0.52<br>IL4+IL10: 0.4<br>IL1 $\beta$ +TNF $\alpha$ +IL4+IL10 : 0.08        | P=0.22<br>P=0.73<br>P=0.7                      | -                           |
|                 |          | -50 mV           |                   |                                                                      | IL1 $\beta$ +TNF $\alpha$ : 0.89<br>IL4+IL10: 0.56<br>IL1 $\beta$ +TNF $\alpha$ +IL4+IL10 : 0.12       | P=0.67<br>P=0.49<br>P=0.78                     |                             |
|                 |          | 50 mV            |                   |                                                                      | IL1 $\beta$ +TNF $\alpha$ : 0.51<br>IL4+IL10: 0.08<br>IL1 $\beta$ +TNF $\alpha$ +IL4+IL10 : 0.21       | P=0.39<br>P=0.44<br>P=0.62                     |                             |
|                 | <b>D</b> | Current density  | Two-way ANOVA     | 3 dpi+IL4: 14<br>3 dpi+IL10: 8                                       | 95.74                                                                                                  | P<0.001                                        | Tukey's multiple comparison |
|                 |          | -150 mV<br>3 dpi |                   | 3dpi+IL4+IL10: 12                                                    | 3 dpi+IL4: 0.09<br>3 dpi+IL10: 0.07<br>3 dpi+IL4+IL10: 0.67                                            | P =0.53<br>P=0.009<br>P=0.05                   | -                           |
|                 |          | -50 mV<br>3 dpi  |                   |                                                                      | 3 dpi+IL4: F < 0.05<br>3 dpi+IL10: 0.72<br>3 dpi+IL4+IL10: 0.61                                        | P =0.09<br>P=0.16<br>P=0.17                    |                             |
|                 |          | 50 mV<br>3 dpi   |                   |                                                                      | 3 dpi+IL4: 0.42<br>3 dpi+IL10: 0.07<br>3 dpi+IL4+IL10: F < 0.05                                        | P =0.06<br>P=0.003<br>P =0.06                  |                             |
| <b>Figure 7</b> | <b>A</b> | Num. of spikes   | Two-way ANOVA     | Con: 29<br>3 dpi: 16<br>3 dpi+sur.: 12                               | 100.2                                                                                                  | P < 0.001                                      | Tukey's multiple comparison |
|                 | <b>B</b> | I/V              | Two-way ANOVA     | 3 dpi+4AP: 11                                                        | 12.02                                                                                                  | P < 0.001                                      | Tukey's multiple comparison |
|                 | <b>C</b> | Vm con           | Two-tailed t-test | TNF $\alpha$ : 11<br>TNF $\alpha$ +sur.: 10<br>TNF $\alpha$ +4AP: 10 | 3 dpi+sur.: 0.46<br>3 dpi+4AP: 0.74<br>TNF $\alpha$ +sur.: 0.85<br>TNF $\alpha$ +4AP: 0.2              | P < 0.001<br>P < 0.001<br>P=0.54<br>P=0.009    | -                           |
|                 | <b>D</b> | Rheobase con     | Two-tailed t-test |                                                                      | 3 dpi+sur.: F < 0.05<br>3 dpi+4AP: F < 0.05<br>TNF $\alpha$ +sur.: F < 0.05<br>TNF $\alpha$ +4AP: 0.34 | P < 0.001<br>P=0.1<br>P=0.88<br>P=0.09         | -                           |
|                 | <b>E</b> | Cm con           | Two-tailed t-test |                                                                      | 3 dpi+sur.: 0.31<br>3 dpi+4AP: 0.86<br>TNF $\alpha$ +sur.: 0.31<br>TNF $\alpha$ +4AP: 0.13             | P=0.17<br>P=0.89<br>P=0.74<br>P=0.006          | -                           |
|                 | <b>F</b> | Rm Con           | Two-tailed t-test |                                                                      | 3 dpi+sur.: F < 0.05<br>3 dpi+4AP: F < 0.05<br>TNF $\alpha$ +sur.: 0.24<br>TNF $\alpha$ +4AP: 0.28     | P=0.53<br>P=0.002<br>P=0.02<br>P=0.01          | -                           |

Data are mean  $\pm$  SEM. Asterisks (\*) mark significance compared to control group and hashtags (#) mark significance compared to 3 dpi group. \*/#  $p < 0.05$ , \*\*/##  $p < 0.01$ , \*\*\*/###  $p < 0.001$ .
