# Supplementary material for: Roles of Cytokines in the Temporal Changes of Microglial Membrane Currents and Neuronal Excitability and Synaptic Efficacy in ATP-Induced Cortical Injury Model
Source: MDPI journal article supplement (doi:10.3390/ijms22136853), 2021-06-25
Supplement: s1 [file s1]

**Table S3. Electrophysiological properties of microglia in response to cytokines and ATP in Figure 6.**

| Figure 6                        | Concentration   | N  | V <sub>m</sub> (mV) | V <sub>rev</sub> (mV) | C <sub>m</sub> (pF) | R <sub>m</sub> (GΩ) |
|---------------------------------|-----------------|----|---------------------|-----------------------|---------------------|---------------------|
| <b>A. Con</b>                   | -               | 28 | -46.18 ± 3.41       | -82.02 ± 1.33         | 25.44 ± 1.43        | 3.03 ± 0.24         |
| <b>TNFα</b>                     | 10 ng/ml        | 8  | -30.43 ± 3.68,<br>* | -89.85 ± 5.83         | 24.76 ± 1.21        | 1.4 ± 0.18, ***     |
| <b>IL1β</b>                     | 10 ng/ml        | 7  | -54.1 ± 7.97        | -83.74 ± 1.85         | 30.69 ± 2.24        | 3.79 ± 0.91         |
| <b>IL10</b>                     | 10 ng/ml        | 7  | -51.89 ± 4.02       | -81.9 ± 1.94          | 21.8 ± 1.23         | 3 ± 0.46            |
| <b>IL4</b>                      | 10 ng/ml        | 9  | -45.87 ± 4.94       | -99.34 ± 4.53,<br>**  | 26.23 ± 1.82        | 5.98 ± 1.99         |
| <b>ATP-γ-S</b>                  | 100μM           | 7  | -48.49 ± 7.44       | -88.25 ± 1.59,<br>*** | 20.44 ± 1.18, *     | 3.5 ± 0.51          |
| <b>ATP-γ-S</b>                  | 300μM           | 14 | -37.23 ± 3.46       | -91.25 ± 4.9,<br>**   | 23.07 ± 0.91        | 2.42 ± 0.42         |
| <b>B. ATP</b>                   | 1 mM            | 14 | -40.52 ± 3.28       | -72.21 ± 2.34         | 22.4 ± 1.7          | 2.56 ± 0.33         |
| <b>TNFα</b>                     | 30 ng/ml        | 9  | -48.54 ± 4.4        | -79.64 ± 2.59         | 22.35 ± 1.43        | 2.7 ± 0.35          |
| <b>IL1β</b>                     | 30 ng/ml        | 11 | -38.34 ± 4.84       | -98.86 ± 6.34,<br>*   | 38.08 ± 6.08        | 3.82 ± 0.33         |
| <b>IL10</b>                     | 30 ng/ml        | 8  | -47.76 ± 6.49       | -82.19 ± 1.18         | 26.14 ± 1.43        | 3.38 ± 0.39         |
| <b>IL4</b>                      | 30 ng/ml        | 11 | -47.46 ± 4.96       | -80.74 ± 3.43         | 20.81 ± 1.54        | 3.47 ± 0.37         |
| <b>C. TNFα + IL1β</b>           | Each 10 ng/ml - | 12 | -37.93 ± 4.68       | -78.8 ± 1.93          | 21.75 ± 2.31        | 2.88 ± 0.51         |
| <b>IL10 + IL4</b>               | Each 10 ng/ml - | 12 | -47.25 ± 5.13       | -81.91 ± 1.2          | 28.35 ± 1.31, *     | 3.23 ± 0.41         |
| <b>TNFα + IL1β + IL10 + IL4</b> | Each 10 ng/ml - | 13 | -51.44 ± 5.16       | -80.19 ± 0.88         | 27.83 ± 1.26, *     | 3.07 ± 0.35         |
| <b>D. 3 dpi</b>                 | -               | 31 | -53.13 ± 3.15       | -74.58 ± 0.49,<br>*** | 30.75 ± 2.24, *     | 1.16 ± 0.1, ***     |

|                           |            |    |                           |                         |                           |                     |
|---------------------------|------------|----|---------------------------|-------------------------|---------------------------|---------------------|
| <b>3 dpi + IL10</b>       | 10 ng/ml - | 8  | -68.18 ± 5.23,<br>**, #   | -89.58 ± 4.24,<br>*, ## | 29.45 ± 1.25, *           | 2.64 ± 0.57, #      |
| <b>3 dpi + IL4</b>        | 10 ng/ml - | 14 | -56.06 ± 6.64             | -82.36 ± 2.29,<br>##    | 41.29 ± 1.89,<br>***, ### | 1.19 ± 0.16,<br>*** |
| <b>3 dpi + IL10 + IL4</b> | 10 ng/ml - | 12 | -69.71 ± 3.97,<br>***, ## | -73.92 ± 2.57,<br>**    | 41.03 ± 7.99              | 1.49 ± 0.23, **     |

Data are mean ± SEM. Asterisks (\*) mark significance compared to control group and hashtags (#) mark significance compared to 3 dpi group. \*/# p < 0.05, \*\*/## p < 0.01, \*\*\*/### p < 0.001.
