# Supplementary material for: Roles of Cytokines in the Temporal Changes of Microglial Membrane Currents and Neuronal Excitability and Synaptic Efficacy in ATP-Induced Cortical Injury Model
Source: MDPI journal article supplement (doi:10.3390/ijms22136853), 2021-06-25
Supplement: s1 [file s1]

**Table S2. Electrophysiological properties of neurons in response to cytokines and ATP in Figure 5.**

| Figure 5               | concentration | N  | V <sub>m</sub> (mV) | Rheobase (pA)       | C <sub>m</sub> (pF)    | R <sub>m</sub> (mΩ)    |
|------------------------|---------------|----|---------------------|---------------------|------------------------|------------------------|
| <b>A. Con</b>          |               | 29 | -70.84 ± 1.22       | 38.97 ± 2.5         | 64.62 ± 3.48           | 271.91 ± 12.61         |
| <b>3 dpi</b>           |               | 16 | -69.97 ± 2.18       | 25.63 ± 2.41, **    | 46.49 ± 4.09, **       | 334.27 ± 39.11         |
| <b>TNFα</b>            | 10 ng/ml      | 11 | -67.83 ± 2.79       | 42.73 ± 4.28, ###   | 50.57 ± 3.89, *        | 271.88 ± 21.87         |
| <b>IL1β</b>            | 10 ng/ml      | 11 | -64.06 ± 1.09 **    | 41.82 ± 3.25, ###   | 59.03 ± 4.52           | 308.36 ± 23.09         |
| <b>IL10</b>            | 10 ng/ml      | 10 | -71.58 ± 1.72       | 75 ± 7.19, ***, ### | 92.79 ± 8.4, ***, ###  | 174 ± 18.14, ***, ###  |
| <b>ATP</b>             | 1 mM          | 14 | -75.93 ± 1.41, *    | 43.57 ± 4.87        | 82.44 ± 5.39           | 207.95 ± 20.23         |
| <b>ATP-γ-S</b>         | 100 μM        | 4  | -77.88 ± 1.98, *    | 45 ± 9.57           | 89.26 ± 14.8           | 220.12 ± 44.67         |
| <b>IL4</b>             | 10 ng/ml      | 16 | -66.86 ± 1.09       | 60 ± 6.89, **, ###  | 85.81 ± 7.77 **<br>### | 205.18 ± 21.07, **, ## |
| <b>C. 3 dpi + IL10</b> | 10 ng/ml      | 7  | -67.69 ± 2.36       | 42.86 ± 5.65, ##    | 54.31 ± 3.32           | 221.91 ± 20.33 #       |
| <b>3 dpi + IL4</b>     | 10 ng/ml      | 11 | -64.58 ± 1.52, *    | 43.64 ± 2.44, ###   | 60.12 ± 5.84           | 202.57 ± 17.5, ##      |

Data are mean ± SEM. Asterisks (\*) mark significance compared to control group and hashtags (#) mark significance compared to 3 dpi group. \*/# p < 0.05, \*\*/## p < 0.01, \*\*\*/### p < 0.001.
