# Supplementary material for: Roles of Cytokines in the Temporal Changes of Microglial Membrane Currents and Neuronal Excitability and Synaptic Efficacy in ATP-Induced Cortical Injury Model
Source: Int J Mol Sci. 2021 Jun 25;22(13):6853. doi: 10.3390/ijms22136853 (PMC8268462; doi:10.3390/ijms22136853)
Supplement: Supplementary file 1 [file ijms-22-06853-s001.zip]

Archive with 4 entries (4 files):
- Supplementary Figure S1-CHK.pdf
- Supplementary File-Table S1-CHK.pdf
- Supplementary File-Table S2-CHK.pdf
- Supplementary File-Table S3-CHK.pdf
